# Supplementary material for: Berberine inhibits free fatty acid and LPS-induced inflammation via modulating ER stress response in macrophages and hepatocytes
Source: PubMed Central journal article supplement (PMC7194368; doi:10.1371/journal.pone.0232630), 2020-05-01

# Supplementary Fig.S3

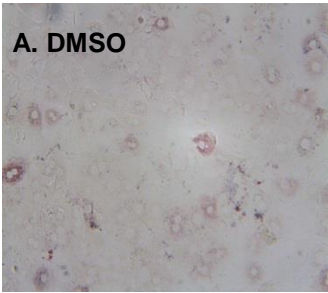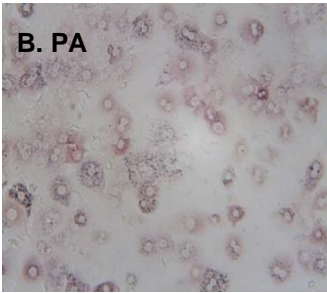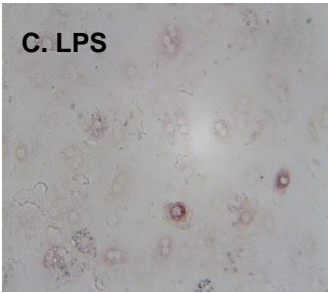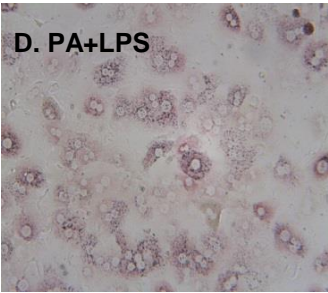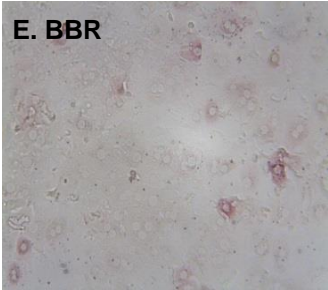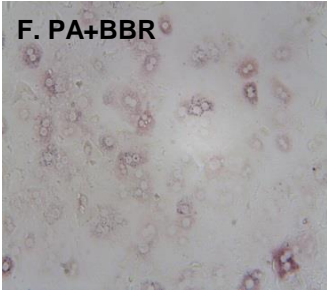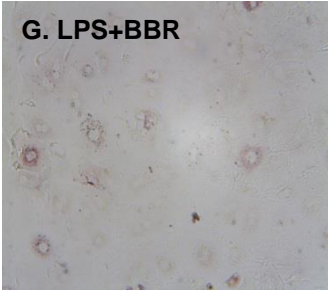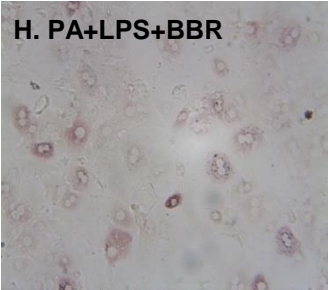

Supplement: pone.0232630.s003.pdf [file pone.0232630.s003.pdf]
