# Supplementary material for: Berberine inhibits free fatty acid and LPS-induced inflammation via modulating ER stress response in macrophages and hepatocytes
Source: PubMed Central journal article supplement (PMC7194368; doi:10.1371/journal.pone.0232630), 2020-05-01
Supplement: pone.0232630.s006.pdf [file pone.0232630.s006.pdf]

a. (Fig. 2D)

|                 |   |   |   |   |   |   |   |   |
|-----------------|---|---|---|---|---|---|---|---|
| BBR (5 $\mu$ M) | - | + | - | + | - | + | - | + |
| PA (0.25 mM)    | - | - | + | + | - | - | + | + |
| LPS (25 ng/mL)  | - | - | - | - | + | + | + | + |

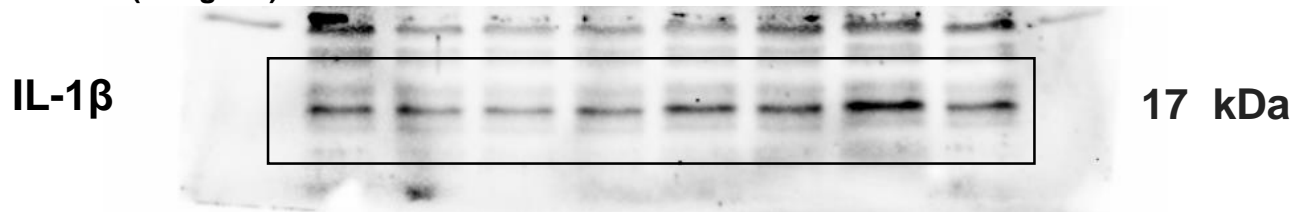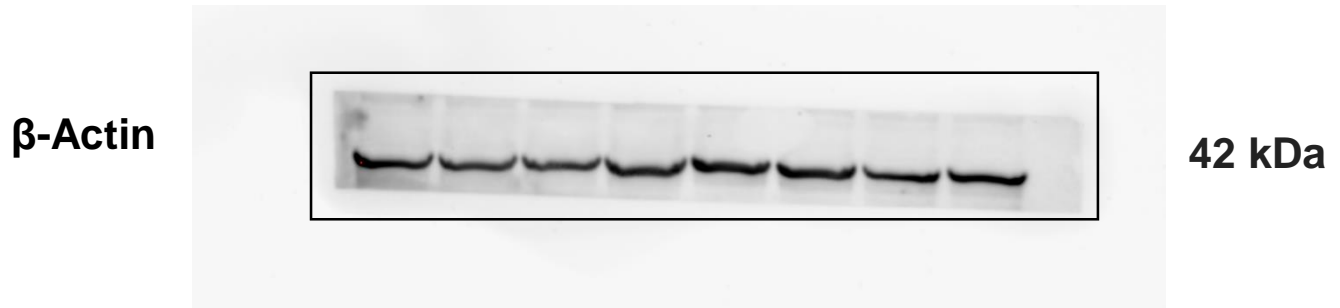

Captured by ChemiDoc MP Imaging System

b. (Fig. 4A)

|                 |   |   |   |   |   |   |   |   |
|-----------------|---|---|---|---|---|---|---|---|
| BBR (5 $\mu$ M) | - | + | - | + | - | + | - | + |
| PA (0.25 mM)    | - | - | + | + | - | - | + | + |
| LPS (25 ng/mL)  | - | - | - | - | + | + | + | + |

**CHOP**

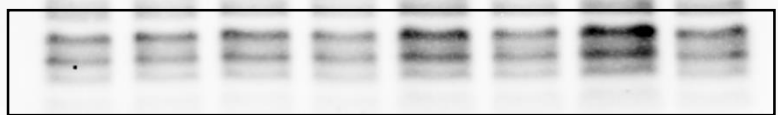

**28 kDa**

**ATF4**

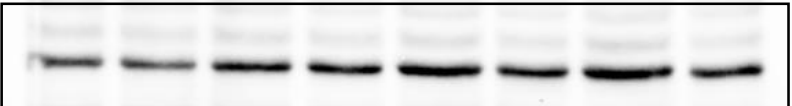

**49 kDa**

**XBP-1**

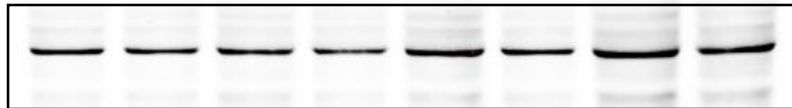

**40 kDa**

**$\beta$ -Actin**

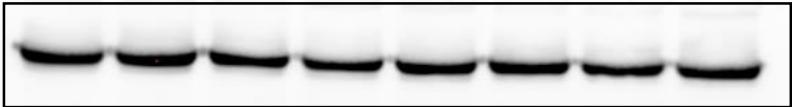

**42 kDa**

c. (Fig. 5)

|                 |   |   |   |   |   |   |   |   |
|-----------------|---|---|---|---|---|---|---|---|
| BBR (5 $\mu$ M) | - | + | - | + | - | + | - | + |
| PA (0.25 mM)    | - | - | + | + | - | - | + | + |
| LPS (25 ng/mL)  | - | - | - | - | + | + | + | + |

p-ERK

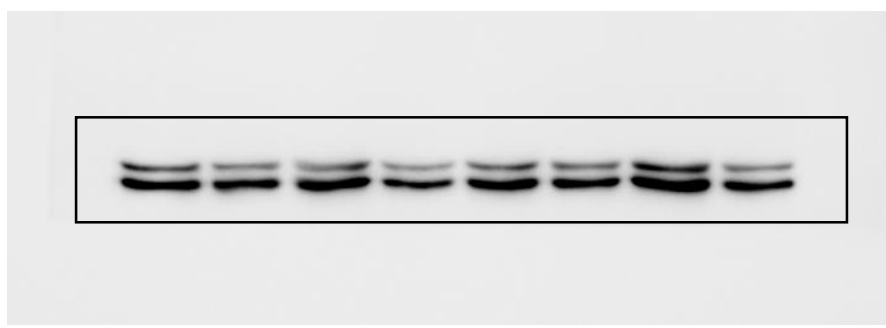

42/44 kDa

T-ERK

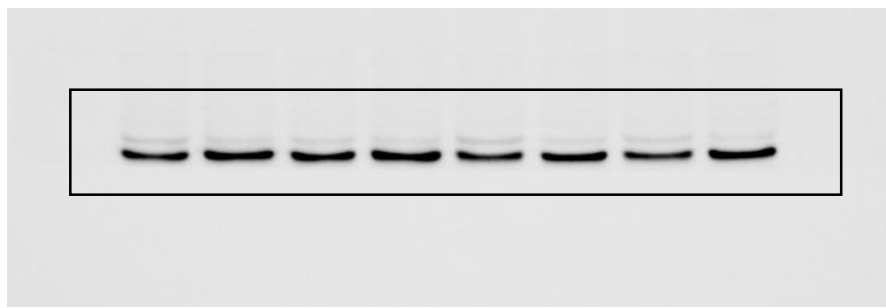

42/44 kDa

Captured by ChemiDoc MP Imaging System

d. (Fig. 6)

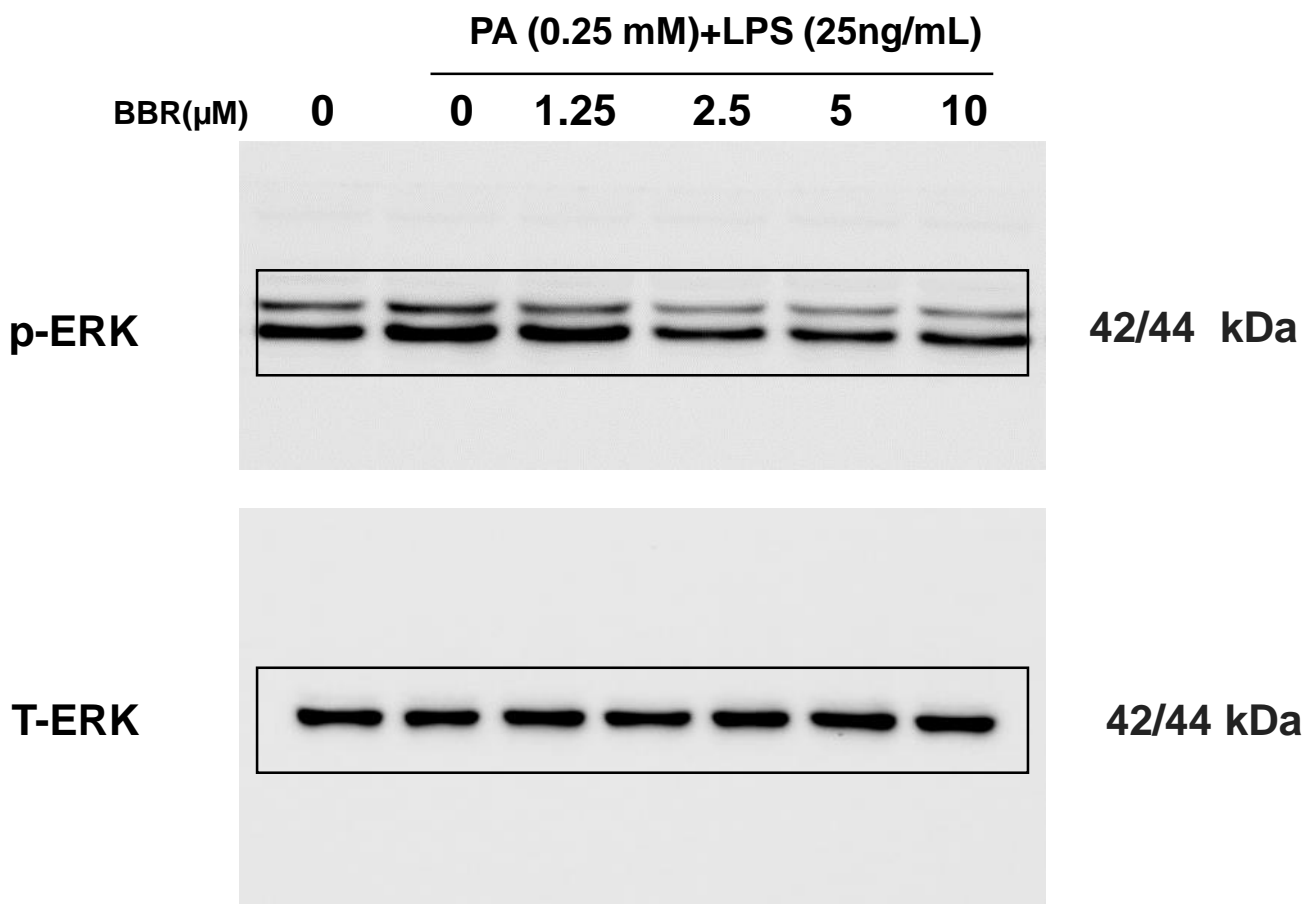

Captured by ChemiDoc MP Imaging System

e. (Fig. 7B)

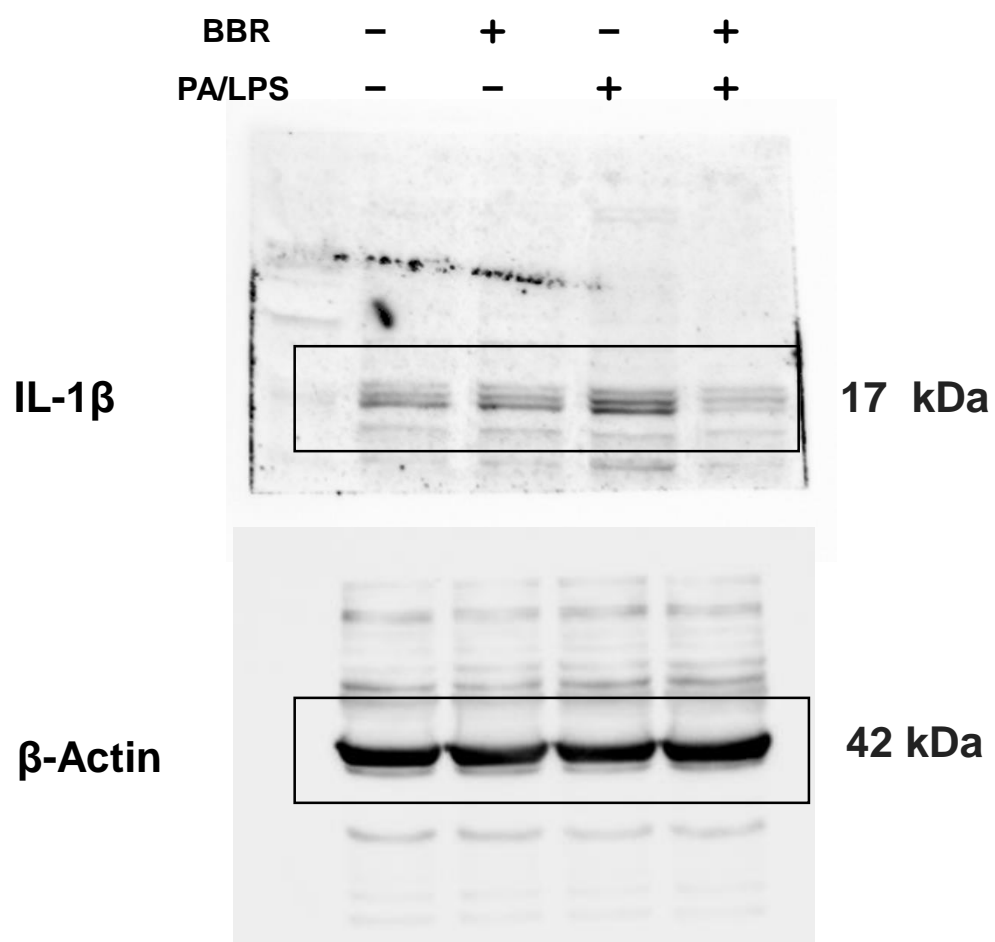

Captured by ChemiDoc MP Imaging System

f. (Fig. 7D)

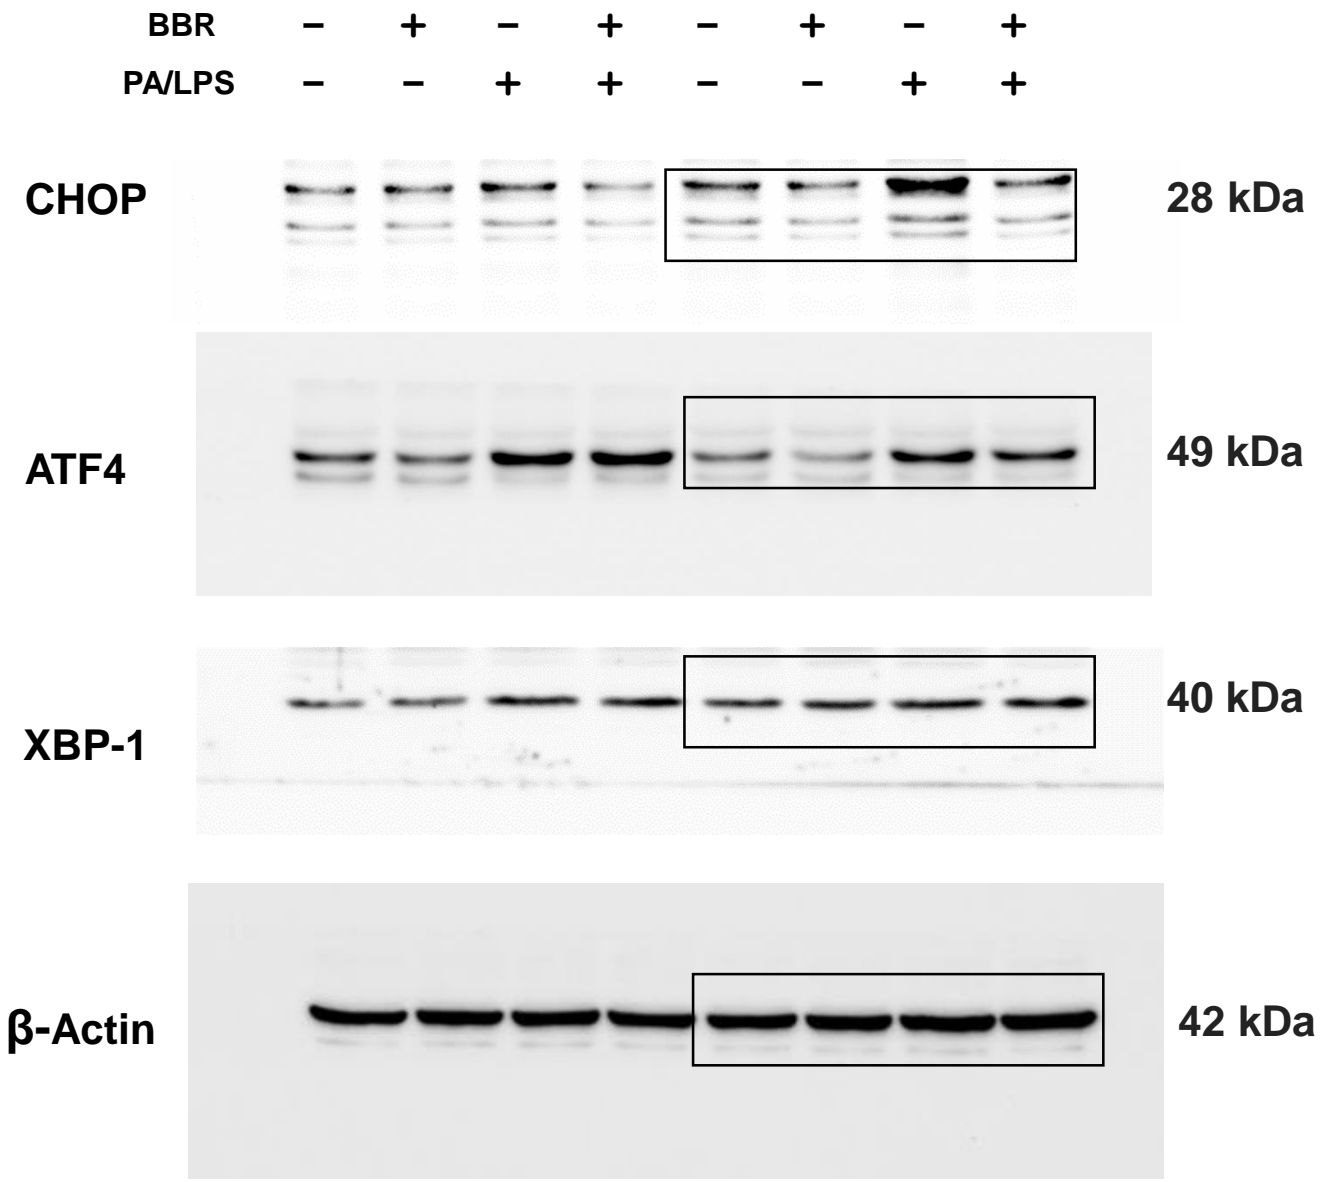

Captured by ChemiDoc MP Imaging System

g. (Fig. 7F)

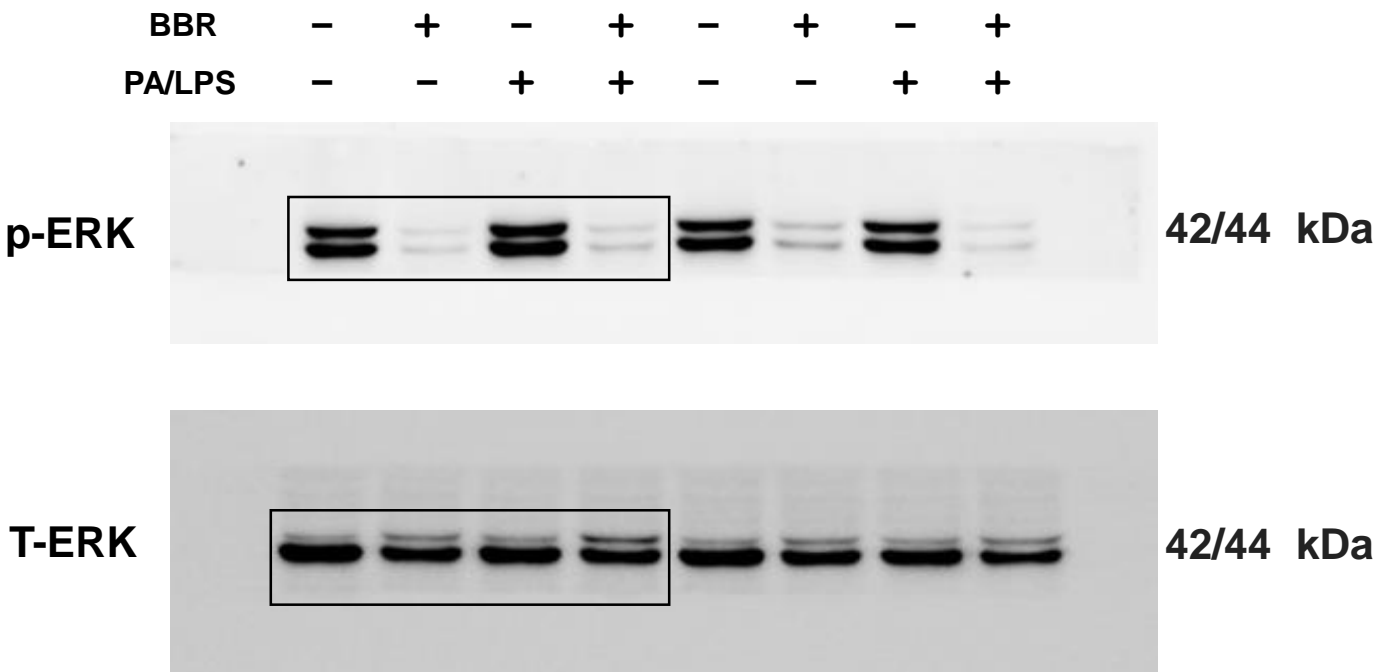

Captured by ChemiDoc MP Imaging System

h. (Fig. S1)

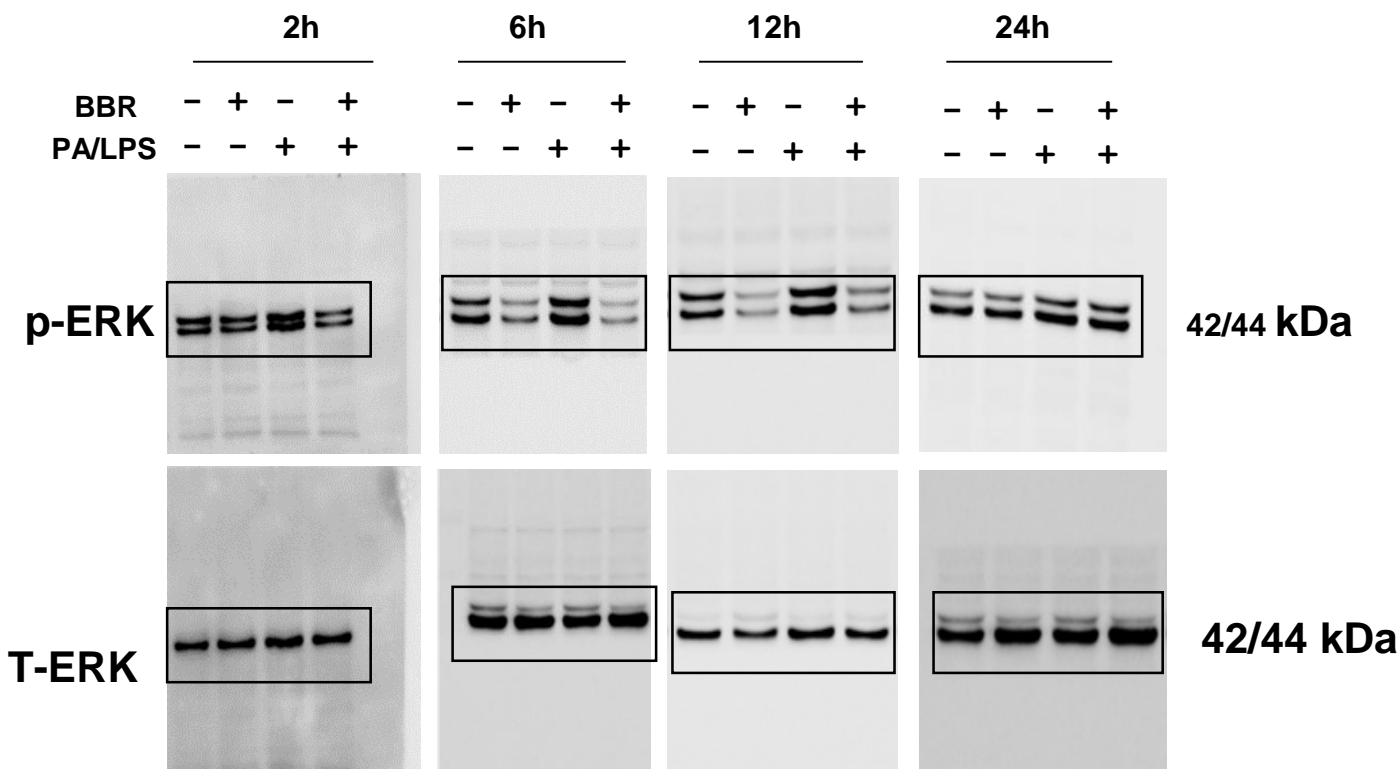

Captured by ChemiDoc MP Imaging System



i. (Fig. S2)

|                 |   |   |   |   |   |   |   |   |
|-----------------|---|---|---|---|---|---|---|---|
| BBR (5 $\mu$ M) | - | + | - | + | - | + | - | + |
| PA (0.25 mM)    | - | - | + | + | - | - | + | + |
| LPS (25 ng/mL)  | - | - | - | - | + | + | + | + |

IRE1 $\alpha$

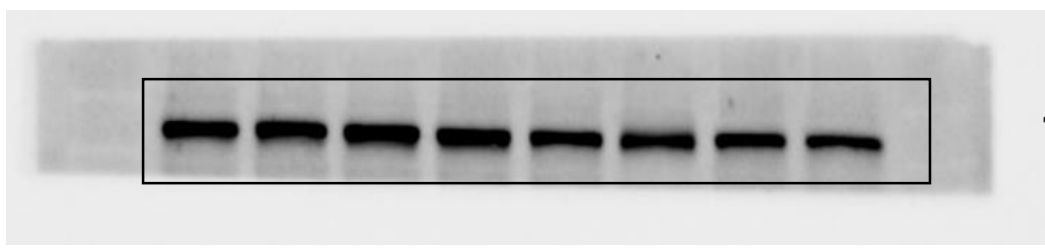

120 kDa

ATF6

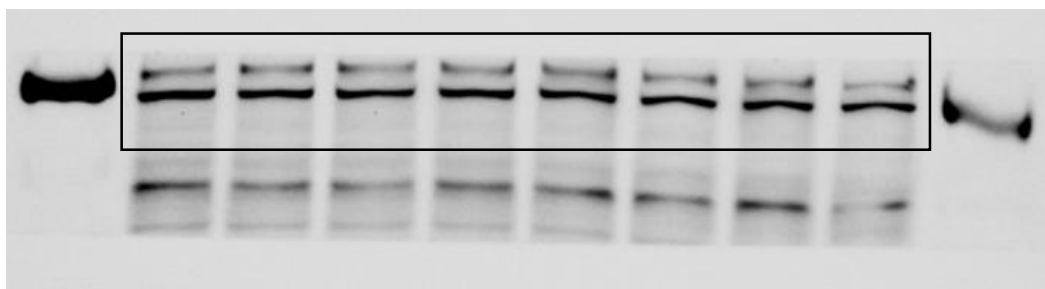

70 kDa

GRP78

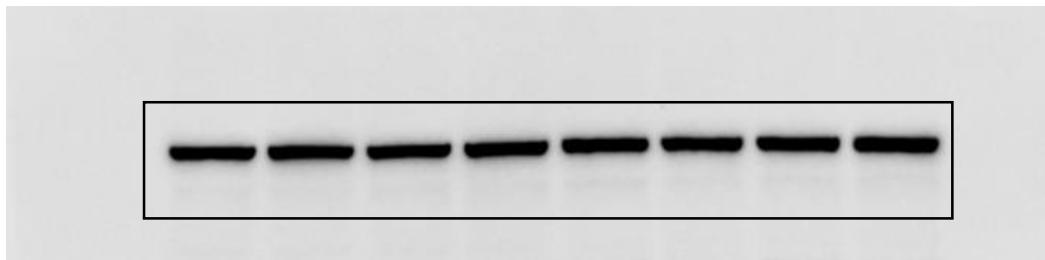

78 kDa

$\beta$ -Actin

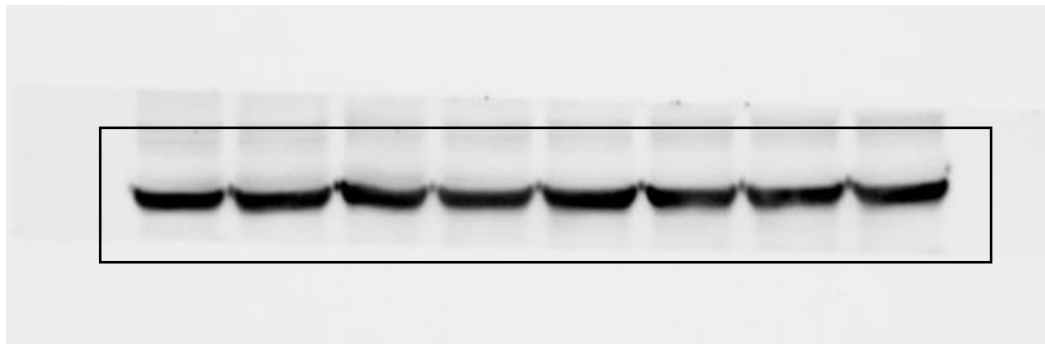

42 kDa

Captured by ChemiDoc MP Imaging System
